# Supplementary material for: Exploratory analysis of transposable elements expression in the C. elegans early embryo
Source: PubMed Central journal article supplement (PMC6873666; doi:10.1186/s12859-019-3088-7), 2019-11-22

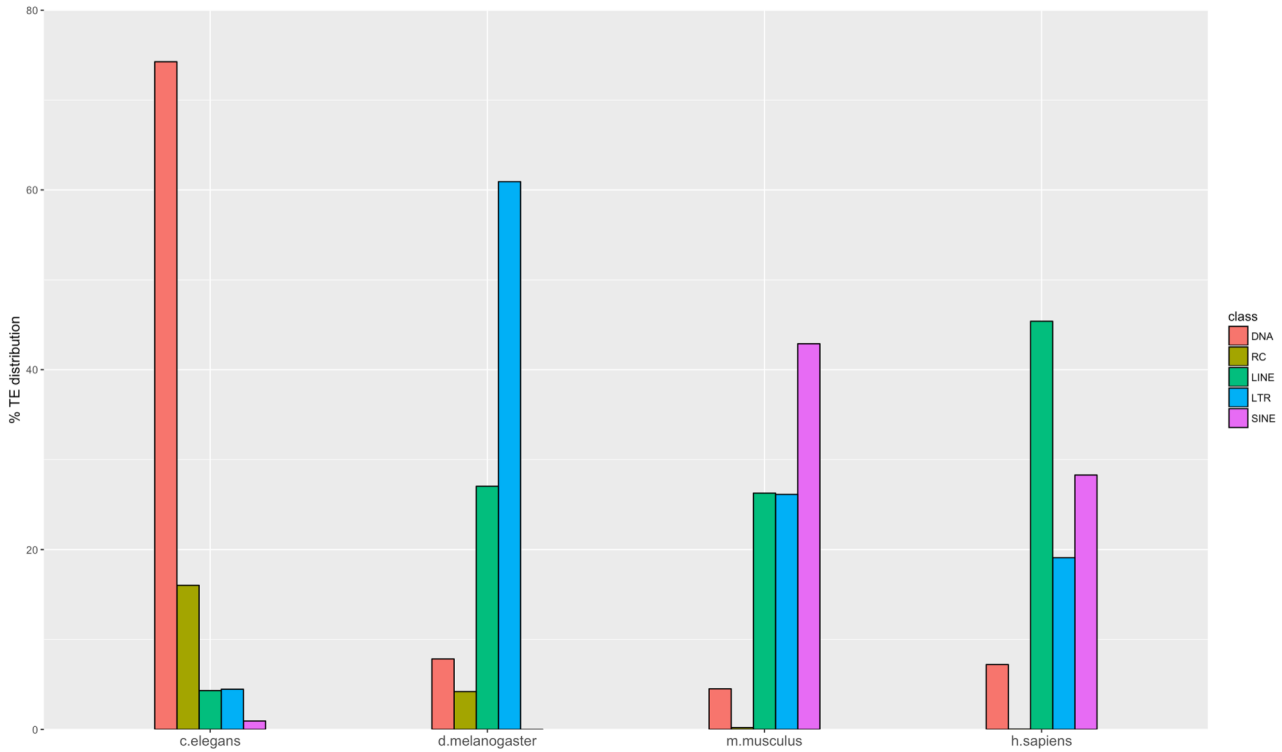

Supplement: 12859_2019_3088_MOESM1_ESM.pdf [file 12859_2019_3088_MOESM1_ESM.pdf]
